# Supplementary material for: Dominance hierarchies, diversity and species richness of vascular plants in an alpine meadow: contrasting short and medium term responses to simulated global change
Source: PeerJ. 2014 May 22;2:e406. doi: 10.7717/peerj.406 (PMC4034599; doi:10.7717/peerj.406)
Supplement: Supplemental Information 1 — Raw data used for the analysis. [file peerj-02-406-s001.xlsx]

## Sheet: 1+2
treatment	nutrient	temperature	year	C	C	C	D	D	D	D	D	D	D	D	E	E	E	E	E	E	E	F	F	F	F	F	F	F	F	F	F	F	F	F	F	F	F	F	F	F	G	G	G	G	G	G	S	S	S
CTR	control	control	1995	0	0	9	4	0	0	0	0	2	1	1	0	6	6	2	0	0	5	0	2	0	0	0	0	1	0	0	3	10	0	0	0	0	0	0	0	0	0	0	0	0	0	0	17	0	0
CTR	control	control	1999	0	0	11	9	0	0	0	0	5	1	2	0	5	3	0	0	0	9	0	2	0	0	0	0	1	0	0	2	6	0	0	0	0	0	0	0	0	0	0	0	0	0	0	12	0	0
CTR	control	control	2001	0	0	9	8	0	0	0	0	2	2	3	0	9	13	7	0	0	10	0	1	0	0	0	0	0	0	0	0	4	0	0	0	0	0	0	0	0	0	0	0	0	0	0	10	0	0
N	nutrient	control	1995	0	0	11	0	2	0	0	0	0	2	5	0	8	0	0	0	0	7	0	0	0	0	0	1	0	0	0	0	12	0	0	0	0	2	0	0	0	15	0	0	0	0	0	6	0	0
N	nutrient	control	1999	0	0	8	0	0	0	0	0	0	0	6	0	3	0	0	0	0	4	0	0	0	0	0	2	1	0	0	0	3	0	2	2	2	11	0	0	0	36	0	0	0	0	0	0	0	0
N	nutrient	control	2001	0	0	8	0	0	0	0	0	0	0	7	0	1	0	0	0	0	6	0	0	0	0	0	3	0	0	0	0	1	0	8	0	0	8	0	0	0	37	0	0	0	0	0	1	0	0
CTR	control	control	1995	0	0	7	3	0	0	0	0	1	0	4	0	30	0	0	0	0	6	0	0	0	0	0	0	2	2	0	0	0	0	0	0	0	0	0	0	0	2	0	0	0	0	0	7	0	0
CTR	control	control	1999	0	0	8	5	0	0	0	0	5	3	5	0	25	0	0	0	0	0	0	0	0	0	0	0	0	1	0	0	3	0	0	0	0	1	0	0	0	1	0	0	0	0	0	7	0	0
CTR	control	control	2001	0	0	12	6	0	0	0	0	3	5	7	0	39	0	0	0	0	5	0	0	0	0	0	0	0	1	0	1	0	0	0	0	0	1	0	0	0	1	0	0	0	0	0	2	0	0
CTR	control	control	1995	1	0	11	4	0	0	0	0	0	0	0	0	20	7	0	0	0	1	0	0	0	0	0	0	1	2	0	2	4	0	0	0	0	0	0	0	0	0	0	0	0	0	0	21	0	0
CTR	control	control	1999	0	0	16	6	0	1	0	1	0	5	0	0	30	10	0	0	0	5	0	0	0	0	1	0	0	1	0	0	2	0	0	0	0	0	0	0	0	0	0	0	0	0	0	9	0	0
CTR	control	control	2001	0	0	11	2	0	2	0	0	0	9	0	0	32	13	0	0	0	5	0	0	0	0	0	0	0	2	0	0	3	0	0	0	0	0	0	0	0	0	0	0	0	0	0	16	0	0
CTR	control	control	1995	0	0	5	5	0	0	0	0	1	3	0	0	30	1	0	0	0	4	0	0	0	0	0	0	0	0	0	0	1	0	0	0	0	0	0	0	0	0	0	0	0	0	0	7	1	0
CTR	control	control	1999	0	0	6	6	0	0	0	0	3	2	1	0	33	5	0	0	0	4	0	0	0	0	0	1	0	0	0	0	1	0	0	0	0	0	1	0	0	0	0	0	0	0	0	4	0	0
CTR	control	control	2001	0	0	8	10	0	0	0	0	2	2	2	0	42	2	0	0	0	4	0	0	0	0	0	0	0	0	0	0	1	0	0	0	0	0	0	0	0	0	0	0	0	0	0	6	0	0
N	nutrient	control	1995	0	1	6	3	4	0	0	0	0	15	1	0	24	0	0	0	0	4	0	0	0	0	0	0	1	0	0	0	7	0	0	0	1	0	0	0	0	0	0	0	0	0	0	7	0	0
N	nutrient	control	1999	0	0	22	2	0	0	0	0	1	14	1	0	27	0	0	0	0	4	0	0	0	0	0	0	0	1	0	2	5	0	0	0	0	0	0	0	0	14	0	0	0	0	0	4	0	0
N	nutrient	control	2001	0	0	5	0	0	0	0	0	0	15	0	0	21	0	1	0	0	2	0	0	0	0	0	0	1	0	0	0	6	0	0	0	0	0	0	0	0	29	0	0	0	0	0	4	0	0
T	control	temperature	1995	0	0	5	1	0	0	0	0	0	0	0	1	15	7	0	0	0	1	0	0	0	0	0	0	1	0	0	0	2	0	0	0	0	1	0	0	0	4	0	0	0	0	0	3	0	0
T	control	temperature	1999	0	0	23	9	0	1	0	0	0	1	0	0	22	6	0	0	0	2	0	0	0	0	0	0	0	0	0	0	1	0	0	0	0	0	0	0	0	0	0	0	0	0	0	3	0	0
T	control	temperature	2001	0	0	10	5	0	1	0	0	0	0	0	0	29	9	0	0	0	3	0	0	0	0	0	0	0	0	0	0	2	0	0	0	0	0	0	0	0	1	0	0	0	0	0	2	0	0
T	control	temperature	1995	0	0	3	0	0	1	0	0	0	1	1	0	29	0	0	0	0	3	0	0	0	0	0	0	0	0	0	0	7	0	0	0	0	2	0	0	0	1	0	0	0	0	0	13	0	0
T	control	temperature	1999	0	0	5	0	0	3	0	0	0	0	2	0	0	0	0	0	0	3	0	0	0	1	0	0	0	1	0	0	4	0	0	0	0	6	0	0	0	9	0	1	0	0	0	3	0	4
T	control	temperature	2001	0	0	3	0	0	4	0	0	0	0	2	0	35	0	0	0	0	4	0	0	0	1	0	0	0	0	0	0	2	0	0	0	0	2	0	0	0	3	0	0	0	0	0	0	0	0
TN	nutrient	temperature	1995	0	0	1	3	0	0	0	0	0	2	9	0	2	6	6	0	5	8	0	0	0	0	0	0	0	0	0	1	8	0	0	0	0	0	0	0	0	0	0	0	0	0	0	6	0	0
TN	nutrient	temperature	1999	0	0	0	6	0	0	0	0	0	0	0	0	0	1	18	0	0	1	0	0	0	0	0	0	0	0	0	2	8	0	4	0	0	0	0	0	0	0	2	0	0	0	0	7	0	0
TN	nutrient	temperature	2001	0	0	0	11	0	0	0	0	0	0	3	0	0	0	44	0	0	4	0	0	0	0	0	0	0	0	0	0	0	0	1	0	0	0	0	0	0	0	0	0	0	0	0	0	0	0
TN	nutrient	temperature	1995	0	0	4	2	0	0	0	0	0	0	3	0	7	2	17	0	0	3	0	2	0	0	0	0	0	0	0	0	3	0	0	0	0	0	0	0	0	0	0	0	0	0	0	6	0	0
TN	nutrient	temperature	1999	0	0	4	2	0	0	0	0	0	0	9	0	4	0	16	0	0	0	0	11	0	0	0	0	0	0	0	1	9	0	7	0	0	0	0	0	0	7	1	0	0	0	0	10	0	0
TN	nutrient	temperature	2001	0	0	0	0	0	0	0	0	0	0	5	0	6	0	24	0	0	0	0	1	0	0	0	0	0	0	0	0	10	0	2	0	0	0	0	0	0	3	1	0	0	0	0	11	0	0
CTR	control	control	1995	0	0	6	0	0	0	0	0	1	0	1	0	17	4	0	1	0	3	0	0	0	0	0	0	4	0	0	0	6	0	0	0	0	5	2	0	0	1	0	0	0	0	0	7	0	0
CTR	control	control	1999	0	0	10	0	0	0	0	0	4	0	5	0	24	3	0	3	0	7	0	0	1	0	0	0	2	0	0	0	1	0	1	0	0	3	2	0	0	4	0	0	0	0	0	9	0	0
CTR	control	control	2001	0	0	4	0	0	0	0	0	3	2	10	0	29	2	0	2	0	6	0	0	2	0	0	0	2	0	0	0	4	0	1	0	0	6	2	0	0	4	0	1	0	0	0	3	0	0
N	nutrient	control	1995	0	0	16	0	0	0	0	0	15	3	1	0	4	2	0	6	0	5	0	1	0	0	0	0	1	0	0	0	14	1	0	0	1	6	0	0	5	5	0	0	0	0	0	10	0	0
N	nutrient	control	1999	0	0	12	0	0	0	0	0	4	1	1	3	2	0	0	1	0	1	0	6	1	0	0	0	2	0	0	0	10	1	1	0	0	8	0	0	10	19	0	0	0	0	0	6	0	0
N	nutrient	control	2001	0	0	8	0	0	0	0	0	3	2	1	0	5	0	0	3	0	3	0	7	0	0	0	1	0	0	0	0	6	4	0	0	0	5	0	0	7	29	0	0	0	0	0	0	0	0
CTR	control	control	1995	0	0	8	0	0	0	0	0	4	0	1	0	6	4	0	3	0	9	1	0	0	0	0	0	6	3	0	0	5	0	0	0	0	4	0	0	1	11	0	0	0	0	0	5	2	0
CTR	control	control	1999	0	0	9	0	0	0	0	0	6	3	0	0	8	2	0	1	0	10	1	3	1	0	0	1	1	3	0	0	3	0	0	0	0	6	0	0	1	11	0	0	0	0	0	7	0	0
CTR	control	control	2001	0	0	7	0	0	0	0	0	8	7	1	0	11	2	0	9	0	9	0	3	1	0	0	0	0	3	0	0	1	0	0	0	0	6	0	0	0	16	0	0	0	0	0	3	0	0
CTR	control	control	1995	0	0	6	0	0	0	0	0	2	0	3	2	1	2	0	5	0	5	0	2	0	0	0	0	5	0	0	0	7	2	0	0	0	3	0	1	5	11	0	0	0	0	0	4	1	0
CTR	control	control	1999	0	0	9	1	0	0	0	0	2	3	3	6	2	5	0	6	0	2	0	4	0	0	0	0	4	0	0	0	10	1	0	0	1	4	0	0	6	10	0	0	0	0	0	3	0	0
CTR	control	control	2001	0	0	11	0	0	0	0	0	1	2	5	6	2	7	1	8	0	5	0	7	0	0	0	0	3	0	0	0	2	4	2	0	0	7	2	0	7	9	0	0	0	0	0	4	0	0
CTR	control	control	1995	0	0	9	0	0	0	0	0	0	3	4	0	32	2	0	0	0	4	0	0	0	0	0	0	1	0	0	0	4	0	0	0	0	3	0	0	0	0	0	0	1	0	0	2	0	0
CTR	control	control	1999	0	0	9	0	0	0	0	0	1	4	7	0	38	1	0	0	0	3	0	3	0	0	0	1	4	0	0	0	3	0	2	0	0	0	0	0	0	3	0	0	0	0	0	1	0	0
CTR	control	control	2001	0	0	9	0	0	0	0	0	5	8	8	0	42	5	0	0	0	4	0	2	0	0	0	0	1	0	0	0	3	0	1	0	0	2	0	0	0	3	0	0	0	0	0	0	0	0
N	nutrient	control	1995	1	1	6	0	3	0	0	0	0	0	1	0	5	0	0	0	1	11	0	4	0	1	0	0	0	0	0	0	7	0	0	2	0	5	0	0	4	9	0	0	0	0	0	9	0	0
N	nutrient	control	1999	0	0	7	0	0	0	0	0	0	0	1	0	0	0	0	0	0	3	0	10	0	0	0	0	0	0	0	0	18	2	7	0	0	5	0	0	3	27	0	0	0	1	0	8	0	0
N	nutrient	control	2001	0	0	5	0	0	0	0	0	0	0	3	0	3	0	0	0	0	6	0	1	0	0	0	0	0	0	0	0	5	3	13	0	0	1	0	0	1	25	0	0	0	2	0	3	0	2
T	control	temperature	1995	0	0	6	0	0	0	0	0	2	0	9	0	8	2	0	0	0	2	0	0	0	0	0	0	1	0	0	0	7	1	0	0	0	8	0	0	0	3	0	2	0	0	0	7	0	0
T	control	temperature	1999	0	0	8	0	0	0	3	0	1	2	12	0	8	1	0	0	0	3	0	1	0	0	0	0	1	0	1	0	5	0	0	0	0	7	0	0	0	3	0	1	0	0	0	6	0	0
T	control	temperature	2001	0	0	10	0	0	0	6	0	1	2	14	0	15	3	0	0	0	5	0	1	0	0	0	0	0	0	0	0	2	0	0	0	0	8	0	0	0	3	0	2	0	0	0	2	0	0
T	control	temperature	1995	0	0	4	0	3	0	0	0	0	2	1	0	7	2	0	0	0	4	0	2	0	0	0	0	4	0	0	0	16	1	0	0	0	6	0	0	1	7	0	0	0	0	0	4	0	0
T	control	temperature	1999	0	0	4	0	0	0	0	0	4	3	3	0	12	1	0	0	0	5	0	14	0	0	0	0	0	1	0	0	7	0	2	0	0	0	0	0	6	6	0	0	0	0	0	7	0	0
T	control	temperature	2001	0	0	4	0	0	0	0	0	5	10	5	0	17	2	0	0	0	4	0	1	0	1	0	0	0	0	0	0	7	1	0	0	0	0	0	0	3	8	0	0	0	0	0	2	0	0
TN	nutrient	temperature	1995	0	0	7	0	0	0	0	0	5	0	5	0	6	2	0	1	0	2	0	1	0	0	0	0	0	0	0	0	4	0	0	0	0	1	0	0	0	3	0	0	0	0	0	5	0	0
TN	nutrient	temperature	1999	0	0	0	0	0	0	0	0	1	0	1	0	0	0	0	1	0	0	0	0	0	0	0	0	0	0	0	0	6	0	0	0	0	5	0	0	4	13	0	0	0	0	14	0	0	0
TN	nutrient	temperature	2001	0	0	1	0	0	0	0	0	0	0	2	0	1	0	0	0	0	0	0	0	0	0	0	0	0	0	0	0	0	0	1	0	0	0	0	0	5	14	0	0	0	0	35	2	0	0
TN	nutrient	temperature	1995	0	0	11	0	1	0	0	0	1	0	2	0	7	4	0	0	0	2	0	1	0	0	0	1	0	0	0	0	8	0	0	0	0	3	0	0	2	8	0	0	0	0	0	4	0	0
TN	nutrient	temperature	1999	0	0	8	0	0	0	0	0	0	0	0	0	1	1	0	0	0	3	0	4	0	0	0	1	0	0	0	0	11	1	0	0	1	5	0	0	2	25	0	0	0	3	0	3	0	0
TN	nutrient	temperature	2001	0	0	4	0	0	0	0	0	0	1	0	0	1	0	0	0	0	5	0	0	0	0	0	0	0	0	0	0	6	2	0	0	0	1	0	0	1	33	0	0	0	2	6	1	0	0
[truncated: 25 more columns]
